# Supplementary material for: An assessment of sensory sensitivity in women suffering from depression using transcutaneous electrical nerve stimulation
Source: PeerJ. 2022 May 9;10:e13373. doi: 10.7717/peerj.13373 (PMC9097666; doi:10.7717/peerj.13373)
Supplement: Supplemental Information 1 [file peerj-10-13373-s001.xlsx]

## Sheet: Arkusz1
N	Group	Age [years]	Height [cm]	Weight [kg]	Treatment [years]	Threshold of sensation [mA]	CGI-S 1- not ill 3 - mildy ill 4 - moderately ill 5 - markedly ill	Hedonic rating (1 – Pleasant, 2 – Neutral, 3 – Unpleasant)	Description of the sensations (1 – Tingling, 2 – Stinging, 4 – Burning, 5 – Pinching, 6 – Numbness)
20	D	18	175	65	1	6.2	3	2	1		4
43	D	18	167	68	2	9.35	3	2	1
31	D	20	167	65	1	7.55	3	2	1
34	D	20	179	74	1	8.1	3	2	1
44	D	21	173	65	0.5	5.35	3	2	1
32	D	23	170	61	2	6.1	3	2	1		4
6	D	25	157	58	2	4.8	3	2	1
25	D	30	173	62	6	7.65	3	2	1		4
21	D	32	165	60	2	7	3	2	1
4	D	34	170	64	10	12.5	3	2	1
11	D	34	158	55	20	6	3	2	1
16	D	35	172	56	5	6.8	3	2	1
12	D	40	165	68	10	6.75	3	2			4
17	D	40	164	69	3	10.05	3	3			4	5
22	D	40	157	62	7	5.95	3	2	1
23	D	42	173	75	20	9.6	3	2	1
28	D	42	174	78	10	7	3	2	1
1	D	45	166	65	21	5.75	3	2	1		4
36	D	45	164	75	6	7.35	3	2	1
7	D	18	165	80	2	5	4	2	1
30	D	18	176	70	0.5	9.65	4	2	1
41	D	19	176	79	1	9.9	4	2	1
2	D	20	158	60	1	10.25	4	2	1
24	D	23	170	68	0.5	9.85	4	2	1
15	D	27	165	60	5	6	4	2	1			5
37	D	27	161	56	2	11.75	4	2	1		4
13	D	33	169	78	15	9.2	4	2	1
35	D	33	169	70	4	10	4	2	1		4
27	D	40	162	75	2	11.75	4	3	1		4	5	6
39	D	42	157	67	3	7.55	4	2	1
45	D	42	170	85	15	10.75	4	2	1
3	D	43	172	60	5	12.75	4	2			4
18	D	44	168	80	2	11.25	4	2	1
29	D	47	159	65	20	9.75	4	2	1
8	D	49	167	66	0.1	10.25	4	2	1
14	D	18	154	60	7	7.85	5	2	1
40	D	18	156	78	0.5	6.1	5	2	1
38	D	30	170	60	10	5.95	5	2	1
10	D	33	175	78	0.5	10.75	5	3	1			5
19	D	37	164	75	10	7.05	5	2	1
26	D	37	164	76	14	6.35	5	2	1
5	D	38	165	65	10	6.1	5	2				5
42	D	41	160	72	10	9	5	3	1		4	5
33	D	43	165	82	24	8	5	3	1				6
20	C	30	177	60		7.2	1	2	1			5
10	C	32	175	64		11.25	1	2	1			5
24	C	32	170	75		8.45	1	2	1
9	C	33	157	72		9.2	1	2	1		4
21	C	33	165	64		5.75	1	2	1
2	C	34	172	55		7.5	1	2	1
14	C	34	155	65		8.35	1	2	1
13	C	35	170	80		7.95	1	2			4
19	C	35	159	64		8.65	1	2	1
16	C	36	170	65		11.1	1	2	1			5
5	C	37	170	70		7.25	1	2			4	5
15	C	37	164	87		5.7	1	2	1
6	C	38	168	60		5.6	1	2	1
26	C	38	160	75		7	1	2	1
1	C	40	165	75		10.25	1	2	1
11	C	40	172	65		6.65	1	2	1
22	C	40	172	56		7.6	1	2	1
29	C	40	157	60		11.1	1	2	1
3	C	41	179	62		10.85	1	2	1		4
4	C	41	159	65		6.6	1	2	1
12	C	41	165	78		8.5	1	2	1		4
17	C	41	160	55		10.35	1	2	1
23	C	42	173	75		9.6	1	2	1			5
30	C	43	169	98		11.85	1	2	1		4
18	C	45	178	72		7.1	1	2	1
25	C	45	152	60		6.95	1	2	1
27	C	46	164	59		5.5	1	2	1				6
8	C	48	167	70		10.65	1	2	1
7	C	49	160	80		5.95	1	2	1		4	5
28	C	49	165	69		6.05	1	2	1
31	C	21	167	64		5.6	1	2	1
32	C	21	174	60		7.5	1	3		2
33	C	22	164	52		16.5	1	1	1
34	C	21	155	49		9.2	1	2	1
35	C	21	167	70		15	1	1	1
36	C	22	178	78		12	1	1	1
37	C	21	174	64		12	1	1	1
38	C	21	173	60		7.7	1	1	1
39	C	21	164	50		7.9	1	1	1
40	C	24	160	55		12	1	1	1
41	C	22	165	68		8.5	1	1	1
